# Supplementary material
Source: PubMed Central journal article supplement (PMC4403254)
Supplement: NIHMS680019-supplement-supplemental_files.pdf [file NIHMS680019-supplement-supplemental_files.pdf]

## Methods S1. Supplemental Materials and Methods

Gallego-Giraldo, G., Hu, J., Urbez, C., Gomez, M.A., Sun, T-P., and Perez-Amador, M.A.  
Role of the gibberellin receptors *GID1* during fruit-set in *Arabidopsis*.

### *Generation of DELLA-GUS gene fusion constructs*

All plasmid constructs containing PCR-amplified DNA inserts were sequenced to confirm that no mutations were introduced by PCR. Oligos used are listed in Supplemental Table S2.

The making of pRGA:GUS (pRG127) was basically through introducing extra restriction digestion sites at both ends of *RGA* coding sequence in a large *RGA* genomic fragment, followed by replacing *RGA* coding region with *GUS* gene by directional cloning. First, a 4-kb *Sall-SacI* DNA fragment spanning the *RGA* locus from pRG108 (1) was inserted into pUC18 to make pRG122. A *KpnI* site had been generated in front of *RGA* coding sequence in this DNA fragment (1). Then, PCR-based “overlap extension” mutagenesis (2) was performed to generate a *BamHI* site at the end of *RGA* coding sequence and to remove the *RGA* stop codon in pRG102, which contains 4-kb *Sall-SacI* DNA fragment of the *RGA* locus in pUC18 (1). In detail, the first round of PCR used two sets of primers: universal M13-20 forward primer plus primer 229, and M13 reverse primer plus primer 230. The second round of PCR used the universal M13-20 forward and reverse primers. The resulting 4-kb PCR DNA was cut with *Sall* and *SacI* and ligated with the *Sall*- and *SacI*-digested vector pHXKa (pHXK with the *BamHI* site removed) to generate pRG106. Note that the stop codon of *RGA* was destroyed in this construct. Next, using a native *XhoI* site in *RGA* coding sequence, an *XhoI-SacI* fragment from pRG106 was inserted into pRG122 to create pRG123, which has *KpnI* and *BamHI* sites at 5'- and 3'- end of *RGA* coding sequence, respectively. A 1.8kb full-length *GUS* gene fragment was then amplified by primers GUS6 and GUS9 from pUC18GUS (3), and replaced *RGA* coding sequence in pRG123 at *KpnI* and *BamHI* sites, resulting in pRG124. The 4-kb *Sall-SacI* fragment containing *GUS* gene from pRG124 was then used to replace the original *Sall-SacI* fragment in pRG103 (1), which contains 15-kb *AvrII* genomic DNA fragment around the *RGA* locus in a cloning vector. The resulting pRG126 plasmid had the endogenous *RGA* coding region replaced by *GUS* gene. At last, the 15-kb *AvrII* genomic DNA from pRG126

was inserted into the *Xba*I site of binary vector pOCA28 to generate pRG127 plasmid which contains approximately 7.7 kb *RGA* promoter that is fused to *GUS* gene. Upon plant transformation, line RGA TC 1.3.1 was selected and used for GUS staining.

For making the pGAI:GUS plasmid, genomic DNA fragment for *GAI* was amplified by PCR from *Arabidopsis* BAC Clone F10B6. Primers (5'GAI5UTR*Xba*I and 3'GAI5UTR*Bam*HI) containing *Xba*I and *Bam*HI sites were used to amplify 4kb of the *GAI* promoter region for directional cloning into binary vector pBI101.1 upstream of the *GUS* reporter gene to generate pGAI:GUS. Upon plant transformation, line GAI TC 4.10.1 was selected and used for GUS staining.

To make the pRGL1:GUS plasmid, genomic DNA fragment for *RGL1* was amplified by PCR from *Arabidopsis* BAC Clone T27F4. Primers (5'RGL15UTR*Sal*I and 3'RGL15UTR*Bam*HI) containing *Sal*I and *Bam*HI sites were used to amplify 4kb of the *RGL1* promoter region for directional cloning into binary vector pBI101.1 upstream of the *GUS* reporter gene to generate pRGL1:GUS. Upon plant transformation, line RGL1 TC 1.1.2 was selected and used for GUS staining.

#### ***qRT-PCR analysis of GID1s and DELLAs***

Oligos for cloning the cDNA fragments that were used to generate the standard curves for qRT-PCR data analysis are listed in the Table S3.

#### **Supplemental references:**

- 1.- Silverstone, A.L., Jung, H.-S., Dill, A., Kawaide, H., Kamiya, Y., and Sun, T.-p.** (2001) Repressing a repressor: Gibberellin-induced rapid reduction of the RGA protein in *Arabidopsis*. *Plant Cell* **13**, 1555–1566.
- 2.- Ho, S.N., Hunt, H.D., Horton, R.M., Pullen, J.K., and Pease, L.R.** (1989) Site-directed mutagenesis by overlap extension using the polymerase chain reaction. *Gene* **1**, 51-59.
- 3.-Dewdney, J.** (1993) Light regulation of glyceraldehydes-3-phosphate dehydrogenase genes of *Arabidopsis thaliana*. PhD thesis. Harvard University

## Supplemental Figure Legends TPJ-00147-2014

**Figure S1.** *GID1* genes are differentially expressed in pistils and fruits (biological replica of Figure 1). (a) Time-course of *GID1* expression during unfertilized pistil and early fruit development. Expression is represented as the copies of cDNA per  $10^3$  copies of *UBQ10*. (b) *GID1* expression in ovules+funiculi (O+F) and valve (V) of hand-dissected unfertilized pistils. Expression was normalized to *UBQ10* and to the expression in the whole pistil at anthesis. Data are mean  $\pm$  SD of a single representative experiment. dpa, days post-anthesis.

**Figure S2.** *DELLA* genes are differentially expressed in pistils and fruits (biological replica of Figure 3). (a) Time-course of *DELLA* expression during unfertilized pistil and early fruit development. Expression is represented as the copies of cDNA per  $10^5$  copies of *UBQ10*. (b) *DELLA* expression in ovules+funiculi (O+F) and valve (V) of hand-dissected unfertilized pistils. Expression was normalized to *UBQ10* and to the expression in the whole pistil at anthesis. Data are mean  $\pm$  SD of a single representative experiment. dpa, day post-anthesis.

**Figure S3.** Fertility and fruit length in self-pollinated double *gid1* null mutants. Mature fruits from self-pollinated pistils were individually harvested at 10 dpa, and fruit length and seed number were measured. Ratio (seed number vs. length) was determined. Fruit length, seed number, and ratio were normalized to data from self-pollinated WT. Mean and SD were calculated from at least 50 pistils/fruits per treatment, and are shown as the percentage relative to WT. The experiment was repeated three times with similar

results. Significant differences (Student's t-test analysis) between the WT and mutants are marked with asterisk (\*\*, p-value <0.001).

**Figure S4.** GID1 expression in double *gid1* null mutants. *GID1* expression was detected in double *gid1* null mutants in pistils at anthesis (a) and in 4-day old seedlings (b). Expression for each gene was normalized to *UBQ10* and to its expression in the WT. na, not assayed. Data are mean  $\pm$  SEM of three biological replicas.

**Figure S5.** Correlation between fruit length and seed number of the double *gid1* null mutants. Flowers were emasculated one day before anthesis and hand pollinated at anthesis with different amounts of WT pollen to vary seed-set. Few flowers were also kept unpollinated. Mature fruits at 10 dpa were individually harvested, and fruit length and seed number were measured. Seed number was plotted against fruit length and correlation coefficient (R<sup>2</sup>) and adjusted regression line were calculated. More than 60 fruits and pistils were used for each genotype. The experiment was repeated twice with similar results.

**Figure S6.** Expression of GA20ox1-GUS and GA20ox2-GUS at 1 dpa is associated with pollen and pollen tube. Reciprocal crosses between WT and transgenic *Arabidopsis* carrying translational fusion constructs (a) *pGA20ox1:GA20ox1-GUS* (Hay *et al.*, 2002) and (b) *pGA20ox2:GA20ox2-GUS* (Frigerio *et al.*, 2006) were performed and siliques at 1 dpa were analyzed by X-GlcA staining. Scale bar is 500  $\mu$ m.

**Table S1.** Primers for qRT-PCR of GID1s and DELLAs and genotyping *gid1* mutants.

**Table S2.** Primers for generating *DELLA-GUS* gene fusions.

**Table S3.** Primers for cloning *GID1s* and *DELLA* genes for qRT-PCR.

**Methods S1.** Supplemental Materials and Methods

**Figure S1**  
Gallego-Giraldo et al.

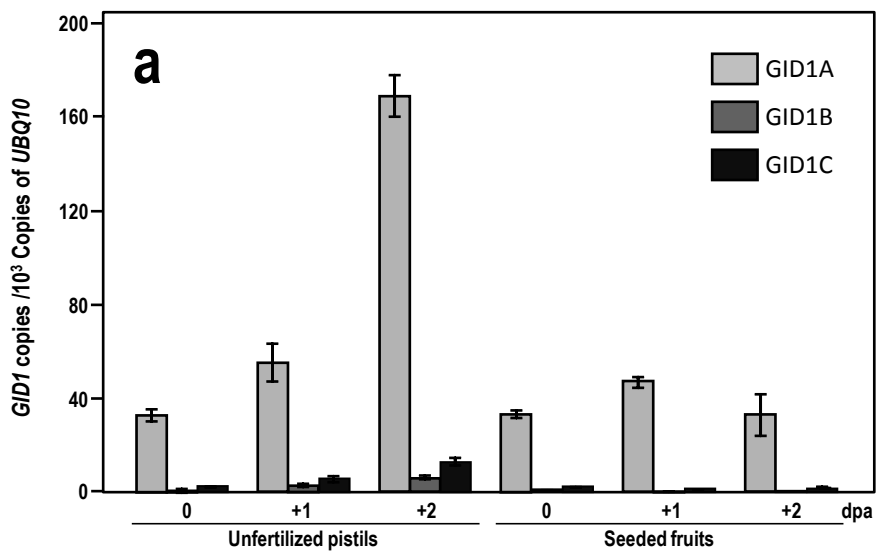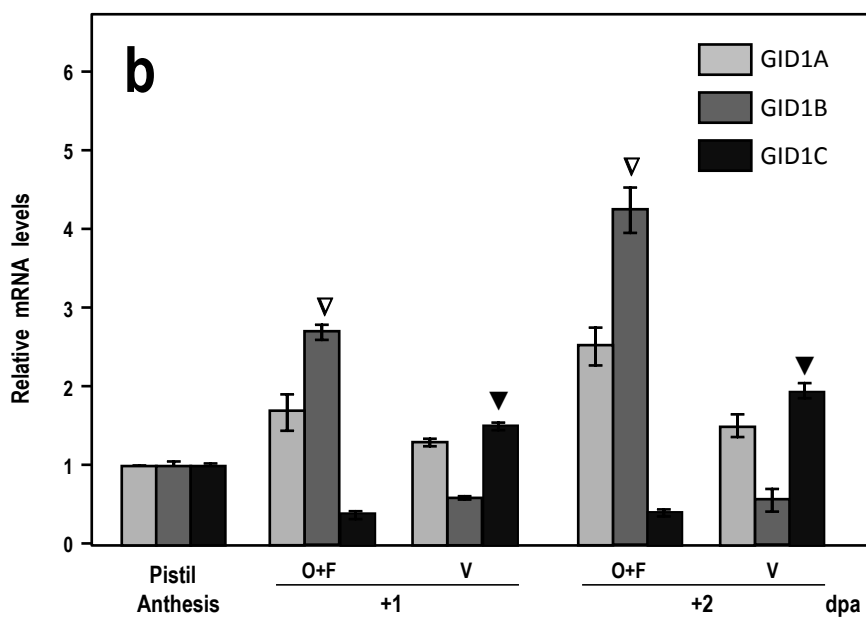

Figure S2  
Gallego-Giraldo et al.

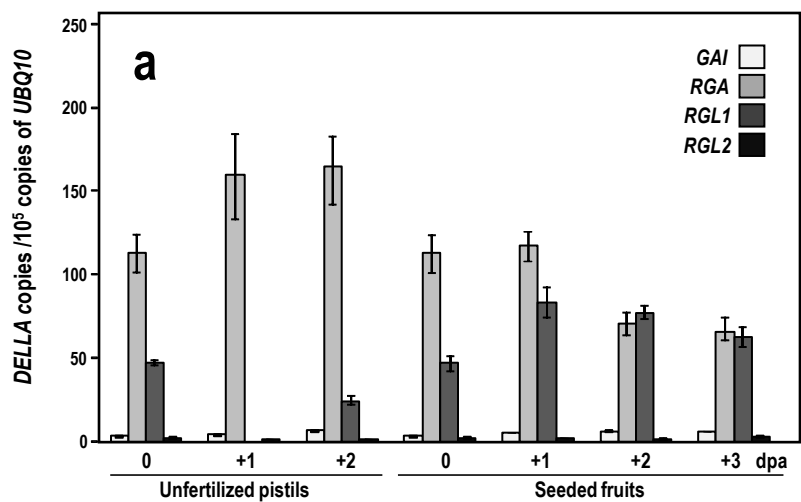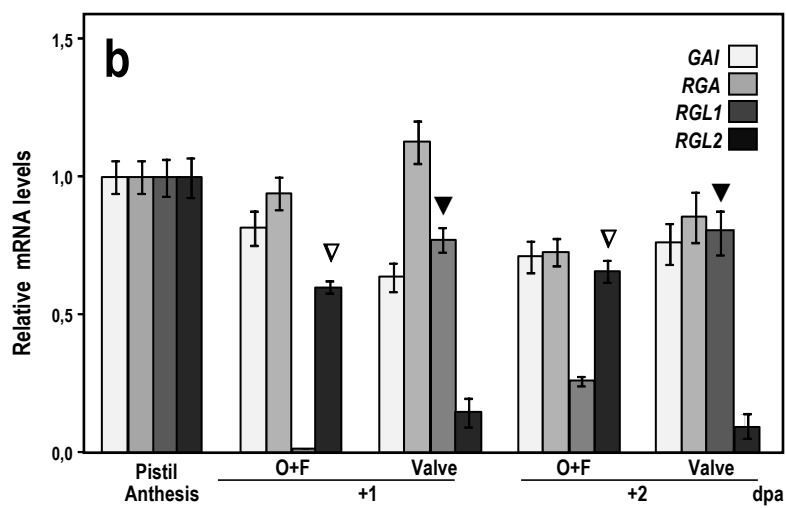

Figure S3  
Gallego-Giraldo et al.

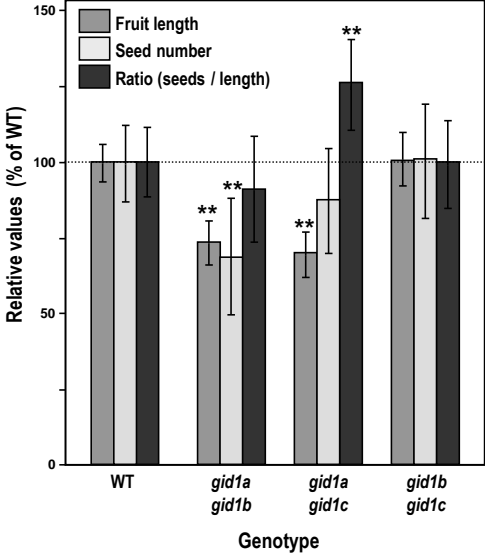



**Figure S4**  
Gallego-Giraldo et al.

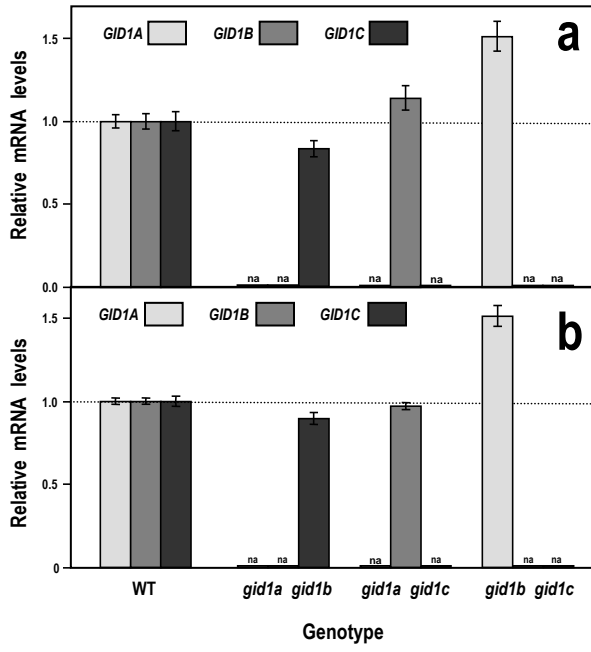

Figure S5  
Gallego-Giraldo et al.

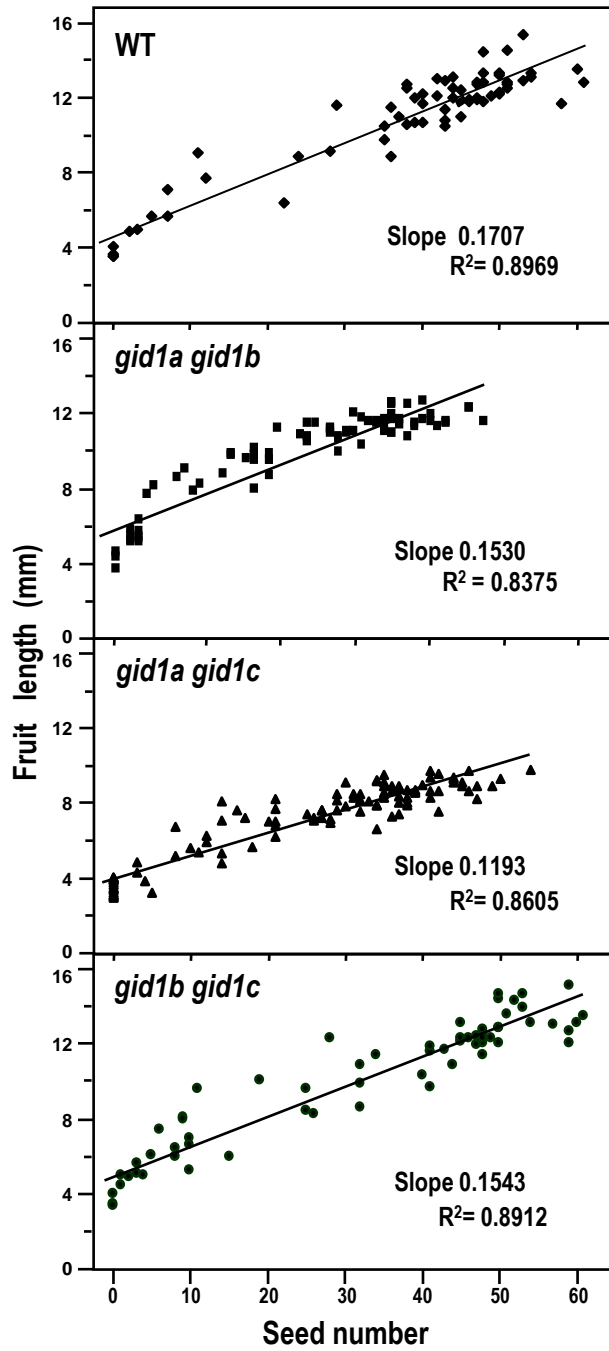

Figure S6  
Gallego-Giraldo et al.

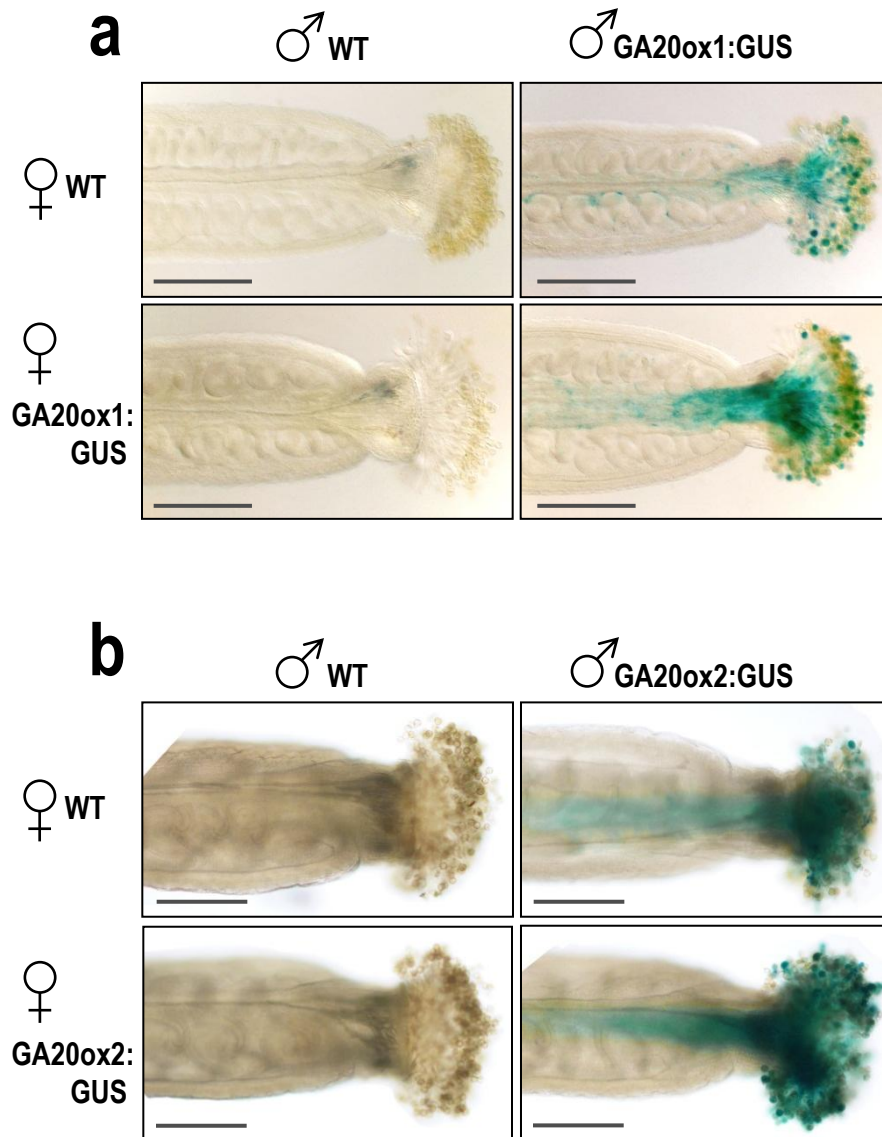

**Table S1.** Primers for qRT-PCR of GID1s and DELLAs and genotyping *gid1* mutants.

| Gene                           | Code             | Oligo    | Oligo sequence                 | Reference                       |
|--------------------------------|------------------|----------|--------------------------------|---------------------------------|
| <b>qPCR analysis</b>           |                  |          |                                |                                 |
| <i>GID1A</i>                   | <i>At3g05120</i> | GID1A-qF | AAACGCTAAAGCTTGTGGAAGAA        | This paper                      |
|                                |                  | GID1A-qR | CCTTTCCAAGTCTCTAAACGCCT        | This paper                      |
| <i>GID1B</i>                   | <i>At3g63010</i> | GID1B-qF | TTCTGTGAGGTCTTGTTGCGC          | This paper                      |
|                                |                  | GID1B-qR | TGCCGATAACCGAAGTGGTCTCTC       | This paper                      |
| <i>GID1C</i>                   | <i>At5g27320</i> | GID1C-qF | ACAAACGGGTGATATCCACCA          | This paper                      |
|                                |                  | GID1C-qR | AAAACGAGAATCTCGGGCTTTC         | This paper                      |
| <i>GAI</i>                     | <i>At1g14920</i> | GAI-qF   | CCTCCGTCGTCTAACGCC             | This paper                      |
|                                |                  | GAI-qR   | GTTGACTCAGCCGTCGCTGTAG         | This paper                      |
| <i>RGA</i>                     | <i>At2g01570</i> | RGA-qF   | AGAAGCAATCCAGCAGA              | This paper                      |
|                                |                  | RGA-qR   | GTGTACTCTCTTCTTACCTTC          | This paper                      |
| <i>RGL1</i>                    | <i>At1g66350</i> | RGL1-qF  | GAGTTCATCAATGACGACGGT          | This paper                      |
|                                |                  | RGL1-qR  | GTACTCTGAGTCAGGCTT             | This paper                      |
| <i>RGL2</i>                    | <i>At3g03450</i> | RGL2-qF  | CACCAAAACCACTACCAGC            | This paper                      |
|                                |                  | RGL2-qR  | CTATCCACACAACCTTCGGG           | This paper                      |
| <i>UBQ10</i>                   | <i>At4g05320</i> | UBQ10-qF | GGCCTTGATAATCCCTGATGAATAAG     | Czechowski <i>et al.</i> , 2005 |
|                                |                  | UBQ10-qR | AAAGAGATAACAGGAACGAAACATAGT    | Czechowski <i>et al.</i> , 2005 |
| <b>Genomic DNA genotyping*</b> |                  |          |                                |                                 |
| <i>GID1A</i>                   | <i>At3g05120</i> | GID1A-F  | GGGTAACTCGAGATCTTGGC           | This paper                      |
|                                |                  | GID1A-R  | CGCCGAAATCTCATCCATAACA         | This paper                      |
|                                |                  | LBA1     | TGGTTCACGTAGTGGGCCATCG         | Griffiths <i>et al.</i> , 2006  |
| <i>GID1B</i>                   | <i>At3g63010</i> | GID1B-F  | TCTCCTGTCCACCAAACATTG          | Griffiths <i>et al.</i> , 2006  |
|                                |                  | GID1B-R  | CTGGGTTTTGGAGACTATGGC          | Griffiths <i>et al.</i> , 2006  |
|                                |                  | SALT-3   | CTTATTTTCAGTAAGAGTGTGGGTTTTTGG | Griffiths <i>et al.</i> , 2006  |
| <i>GID1C</i>                   | <i>At5g27320</i> | GID1C-F  | ACCACCACCTCTTATTAGCTC          | This paper                      |
|                                |                  | GID1C-R  | CAGGGGAACTATACACAAACACAAC      | This paper                      |
|                                |                  | LBA1     | TGGTTCACGTAGTGGGCCATCG         | Griffiths <i>et al.</i> , 2006  |

\*, For genotyping the wt locus, the forward oligo was combined with corresponding reverse oligo. For genotyping the mutant allele, LBA1 (*gid1a-1* and *gid1c-1*) or SALT3 (*gid1b-1*) oligos were combined with the corresponding reverse oligo.

**Table S2.** Primers for generating *DELLA-GUS* gene fusions.

| Gene        | Oligo name      | Oligo sequence                          | Purpose                |
|-------------|-----------------|-----------------------------------------|------------------------|
| <i>GAI</i>  | 5'GAI5UTRXbaI   | 5' -AAGATTCTAGAAGAAGTAATAAAAATGTAAATTC  | GAI-GUS constructs     |
|             | 3'GAI5UTRBamHI  | 5' -TCTCTGGATCCGGTTGGTTTTTTTTTCAG       |                        |
| <i>RGA</i>  | 229             | 5' -GGATCCAGTACGCCGCCGTCGA              | RGA-GUS constructs     |
|             | 230             | 5' -GCGGCGTACTGGATCCGACTCGAA            |                        |
| <i>RGL1</i> | 5'RGL15UTRSaI   | 5' -TAGGAGTCGACATTAACGATATTATTATCG      | RGL1-GUS constructs    |
|             | 3'RGL15UTRBamHI | 5' -TCTCTGGATCCTAAAATTGATTTGCAAGA       |                        |
|             | GUS6            | 5' -ATGCGGTACCTGATCCATGGTACGTCCTGTAGA   |                        |
| <i>GUS</i>  | GUS8            | 5' -TGCGGATCCAGGGAGGTTCCATGGTACGTCCTGTA | GUS gene amplification |
|             | GUS9            | 5' - ATGCGGATCCTCATTGTTTGCCTCCCTGCTG    |                        |

**Table S3.** Primers for cloning *GID1s* and *DELLA* genes for qRT-PCR.

| Gene         | Oligo name | Oligo sequence                   | Purpose            |
|--------------|------------|----------------------------------|--------------------|
| <i>GID1A</i> | GID1A-Fw   | 5' - GTTAACACTGGGTTAGAGAAAG      | GID1A cDNA cloning |
|              | GID1A-Rv   | 5' - GTAAAATCCATTAGAGTACAATG     |                    |
| <i>GID1B</i> | GID1B-Fw   | 5' - GAATAAGTTTGTGCACTCCATAG     | GID1B cDNA cloning |
|              | GID1B-Rv   | 5' - GGAAGTGAGAACTACAACCAC       |                    |
| <i>GID1C</i> | GID1C-Fw   | 5' - CCAATGAGAACACTCTTATC        | GID1C cDNA cloning |
|              | GID1C-Rv   | 5' - GAAAATAAGATCACTTTTAGG       |                    |
| <i>GAI</i>   | GAI-Fw     | 5' - TAAGCAGTCCTAACCGATCCC       | GAI cDNA cloning   |
|              | GAI-Rv     | 5' - TAAATCCGCCGCGGAGAG          |                    |
| <i>RGA</i>   | RGA-Fw     | 5' - CTTTCATCATCCCCAAACACAC      | RGA cDNA cloning   |
|              | RGA-Rv     | 5' - TCGATTTCAGTTCGGTTTAGGTC     |                    |
| <i>RGL1</i>  | RGL1-Fw    | 5' - CAATTATTATGACACTCCCGTG      | RGL1 cDNA cloning  |
|              | RGL1-Rv    | 5' - CCTCAAGTATCGCTTGATTC        |                    |
| <i>RGL2</i>  | RGL2-Fw    | 5' - CCTTACCAACCCATGAAGTAAAG     | RGL2 cDNA cloning  |
|              | RGL2-Rv    | 5' - CTCAAAGATACGCACAAGGTCC      |                    |
| <i>UBQ10</i> | UBQ10-Fw   | 5' - ACCATCACCCCTTGAAGTGAAAG     | UBQ10 cDNA cloning |
|              | UBQ10-Rv   | 5' - AAAAGATTAACATGTTCAAGCCATCCT |                    |
